# Supplementary material for: Nivolumab monotherapy or combination with ipilimumab with or without cobimetinib in previously treated patients with pancreatic adenocarcinoma (CheckMate 032)
Source: PubMed Central journal article supplement — J Immunother Cancer. 2024 Feb 5;12(2):e007883. doi: 10.1136/jitc-2023-007883 (PMC10860063; doi:10.1136/jitc-2023-007883), 2024-02-05
Supplement: jitc-2023-007883supp001.pdf [file jitc-2023-007883supp001.pdf]

## Supplementary Appendix

### **Nivolumab Monotherapy or Combination with Ipilimumab with or without Cobimetinib in Previously Treated Patients with Pancreatic Adenocarcinoma (CheckMate 032)**

Margaret Callahan,<sup>1</sup> Asim Amin,<sup>2</sup> Frederic J. Kaye,<sup>3</sup> Michael Morse,<sup>4</sup> Matthew H. Taylor,<sup>5</sup> Katriina Peltola,<sup>6</sup> Padmanee Sharma,<sup>7</sup> Eileen M. O'Reilly,<sup>8</sup> Stephanie Meadows Shropshire,<sup>9</sup> Shaun O'Brien,<sup>9</sup> Marina Tschaika,<sup>9</sup> Dung T. Le<sup>10</sup>

<sup>1</sup>Memorial Sloan Kettering Cancer Center, New York, NY, USA; <sup>2</sup>Levine Cancer Institute, Atrium Health, Charlotte, NC, USA; <sup>3</sup>University of Florida College of Medicine, Gainesville, FL, USA; <sup>4</sup>Duke University Medical Center, Durham, NC, USA; <sup>5</sup>Earle A. Chiles Research Institute, Providence Cancer Institute, Portland, OR, USA\*; <sup>6</sup>Comprehensive Cancer Center, Helsinki, Finland; <sup>7</sup>MD Anderson Cancer Center, Houston, TX, USA; <sup>8</sup>Memorial Sloan Kettering Cancer Center, New York, NY, USA; <sup>9</sup>Bristol Myers Squibb, Princeton, NJ, USA; <sup>10</sup>Sidney Kimmel Comprehensive Cancer Center, Johns Hopkins University, Baltimore, MD, USA

\*At the time the study was conducted.

**Supplemental Figure 1** Patient disposition. Two crossover patients discontinued treatment due to disease progression and are not counted in the patient status at the end of treatment below.

<sup>a</sup>Includes three patients who received nivolumab 1 mg/kg + ipilimumab 1 mg/kg.

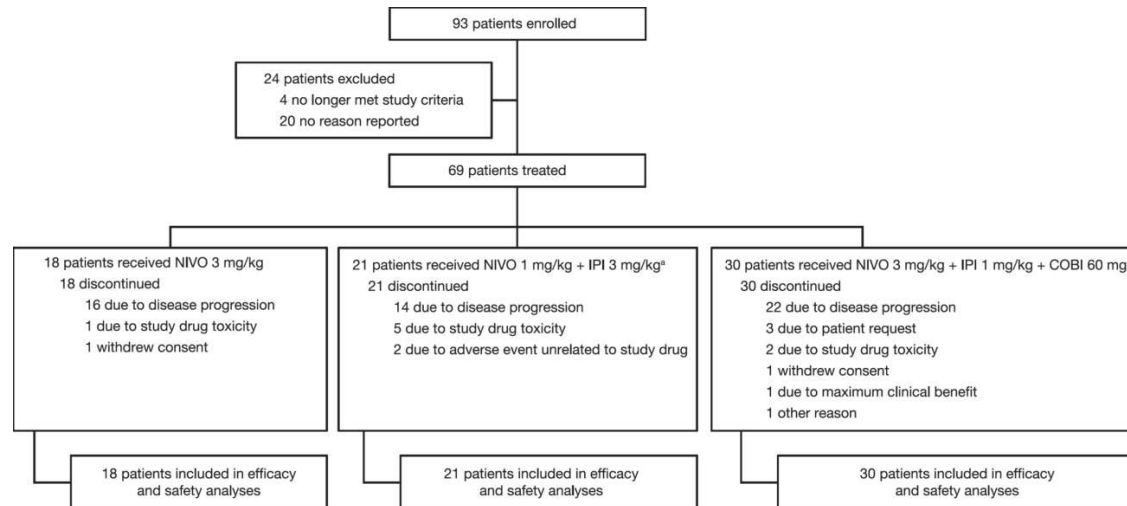

**Supplemental Figure 2** Maximum percentage change from baseline in tumor size with nivolumab monotherapy (**A**), nivolumab plus ipilimumab (**B**), and nivolumab plus ipilimumab plus cobimetinib (**C**). Patients with target lesion at baseline and at least one on-treatment tumor assessment. Negative/positive values mean maximum tumor reduction/minimum tumor increase. Best reduction is based on evaluable target lesion measurements up to progression or start of subsequent therapy/crossover. Horizontal reference line indicates the 30% reduction consistent with a RECIST v1.1 response. Asterisk (\*) indicates responders. Symbol □ represents % change truncated to 100%. <sup>a</sup>Nivolumab 1 mg/kg plus ipilimumab 1 mg/kg not shown as n=2.

A. Nivolumab 3 mg/kg monotherapy

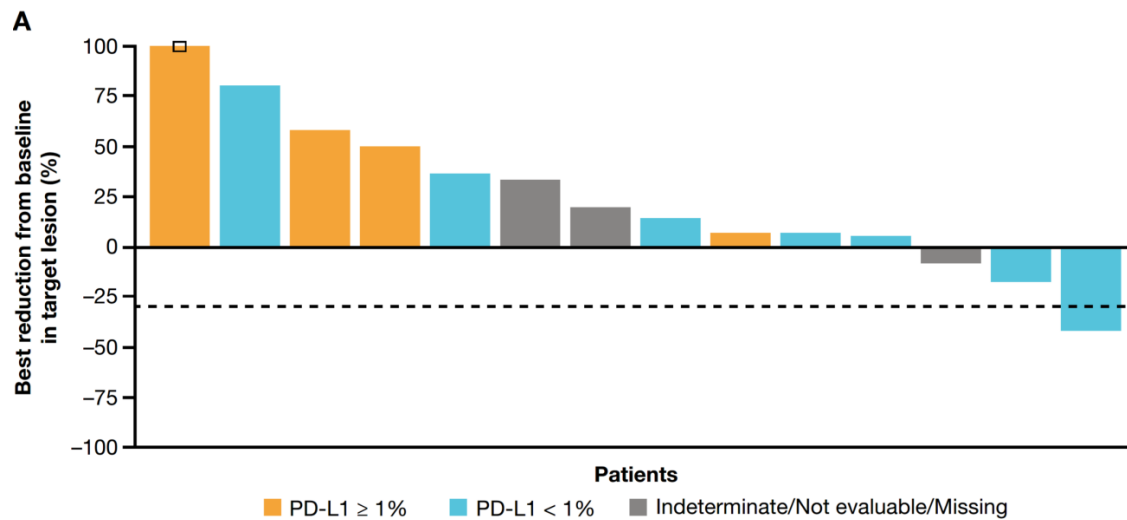

B. Nivolumab 1 mg/kg plus ipilimumab 3 mg/kg<sup>a</sup>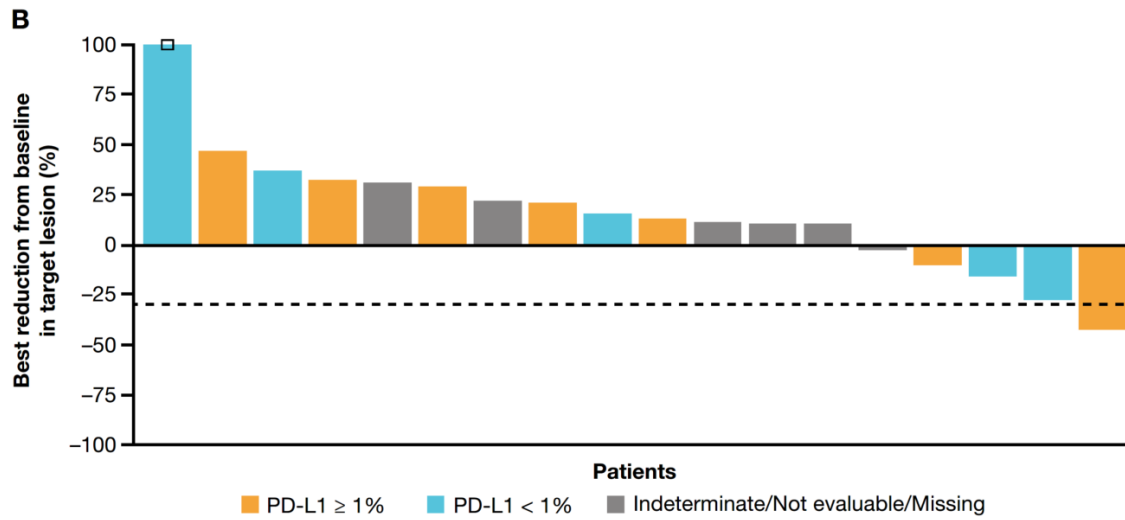

## C. Nivolumab 3 mg/kg plus ipilimumab 1 mg/kg plus cobimetinib 60 mg

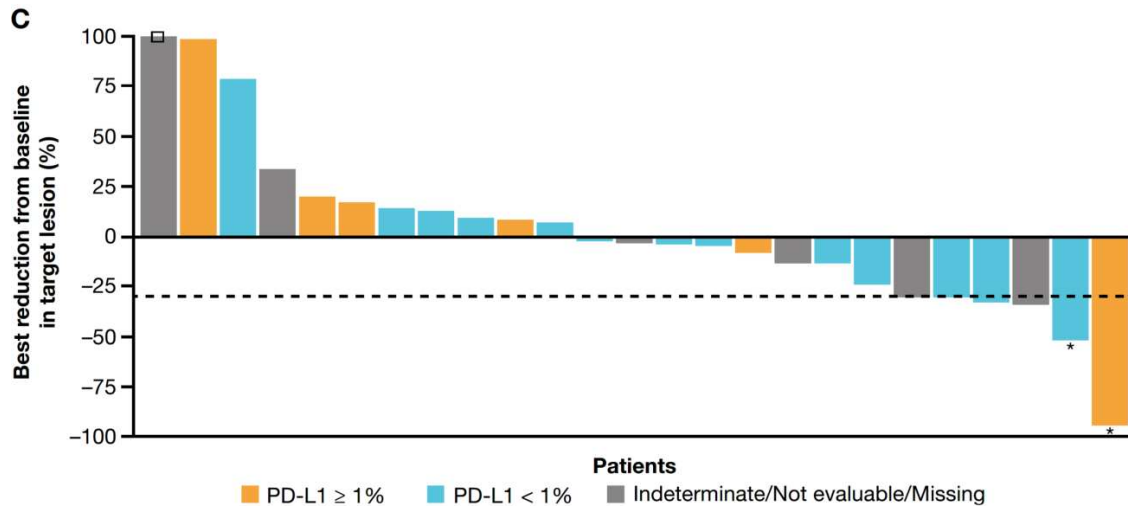

**Supplemental Figure 3** Change in tumor burden over time in individual patients per investigator assessment. Percentage change from baseline in target lesions over time with nivolumab monotherapy (**A**; n= 14), nivolumab plus ipilimumab (**B**; n=16), and nivolumab plus ipilimumab plus cobimetinib (**C**; n=26). The horizontal reference line indicates the 30% reduction consistent with a protocol-defined criteria response. <sup>a</sup>Nivolumab 1 mg/kg plus ipilimumab 1 mg/kg not shown as n=2.

A. Nivolumab 3 mg/kg

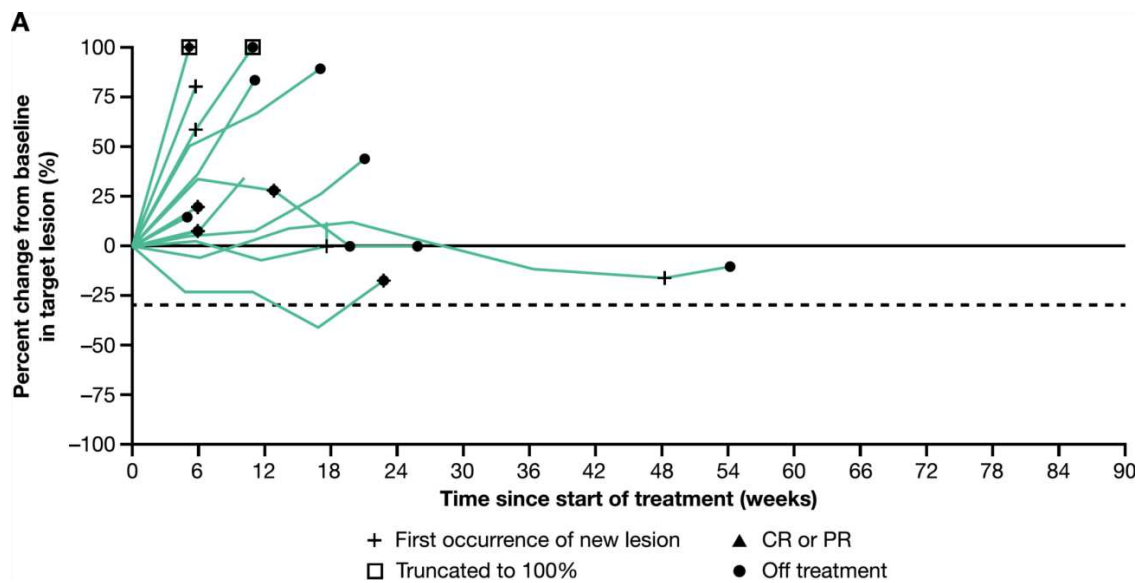

B. Nivolumab 1 mg/kg plus ipilimumab 3 mg/kg<sup>a</sup>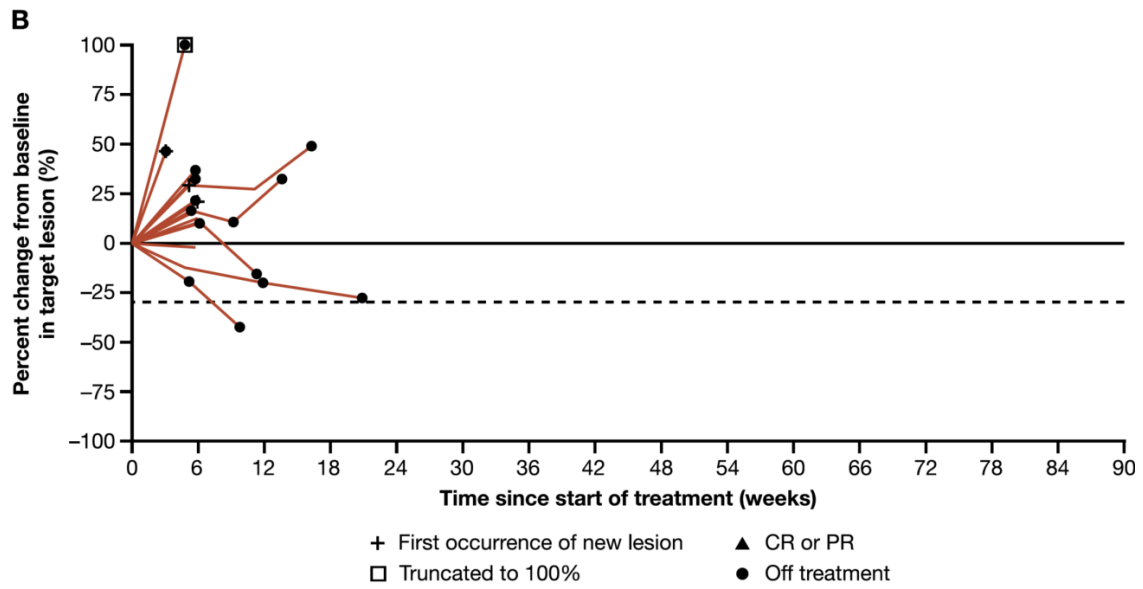

## C. Nivolumab 3 mg/kg plus ipilimumab 1 mg/kg plus cobimetinib 60 mg

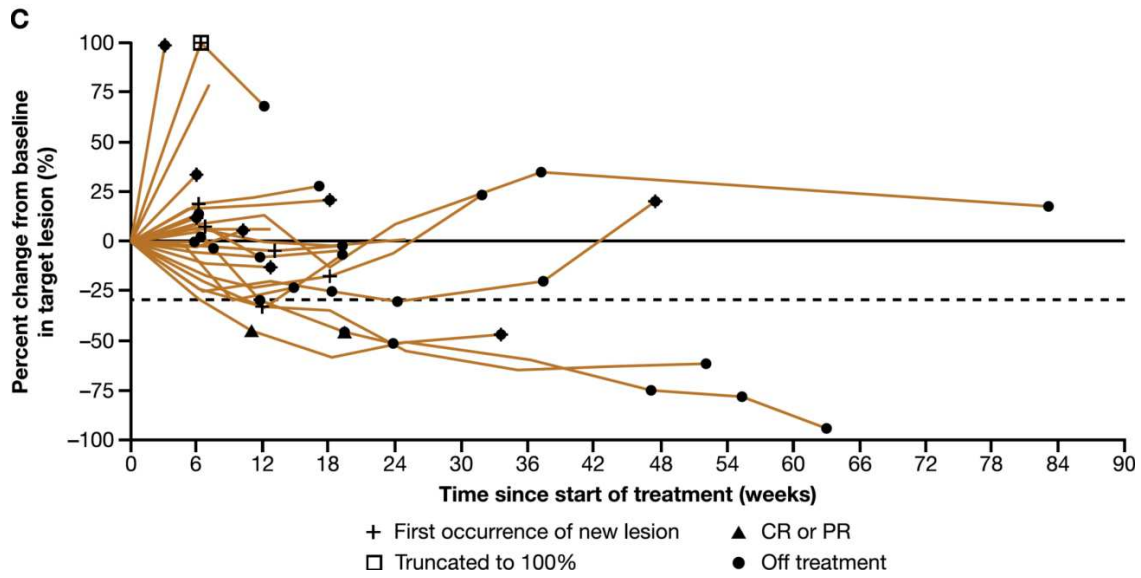



**Supplemental Table 1** Prior systemic cancer therapy in the neoadjuvant and adjuvant settings

|                                                                              | <b>Nivolumab</b> | <b>Nivolumab plus<br/>ipilimumab</b> | <b>Nivolumab plus<br/>ipilimumab plus<br/>cobimetinib</b> |
|------------------------------------------------------------------------------|------------------|--------------------------------------|-----------------------------------------------------------|
|                                                                              | <b>(n=18)</b>    | <b>(n=21)</b>                        | <b>(n=30)</b>                                             |
| <b>Patients with prior regimen in neoadjuvant setting, n (%)<sup>a</sup></b> | <b>3 (17)</b>    | <b>1 (5)</b>                         | <b>5 (17)</b>                                             |
| Fluorouracil/irinotecan/leucovorin/oxaliplatin                               | 3 (17)           | 0                                    | 3 (10)                                                    |
| Gemcitabine                                                                  | 1 (6)            | 0                                    | 1 (3)                                                     |
| Capcitabine                                                                  | 1 (6)            | 0                                    | 0                                                         |
| Gemcitabine/Paclitaxel                                                       | 0                | 1 (5)                                | 0                                                         |
| Cisplatin/irinotecan                                                         | 0                | 0                                    | 1 (3)                                                     |
| <b>Patients with prior regimen in adjuvant setting, n (%)<sup>a</sup></b>    | <b>7 (39)</b>    | <b>5 (24)</b>                        | <b>11 (37)</b>                                            |
| Capcitabine/gemcitabine                                                      | 0                | 2 (10)                               | 4 (13)                                                    |
| Gemcitabine                                                                  | 4 (22)           | 1 (5)                                | 0                                                         |
| Capcitabine                                                                  | 1 (6)            | 0                                    | 1 (3)                                                     |

|                                                   | <b>Nivolumab</b> | <b>Nivolumab plus<br/>ipilimumab</b> | <b>Nivolumab plus<br/>ipilimumab plus<br/>cobimetinib</b> |
|---------------------------------------------------|------------------|--------------------------------------|-----------------------------------------------------------|
|                                                   | <b>(n=18)</b>    | <b>(n=21)</b>                        | <b>(n=30)</b>                                             |
| Gemcitabine/paclitaxel                            | 0                | 0                                    | 2 (7)                                                     |
| Capcitabine/gemcitabine/paclitaxel                | 1 (6)            | 0                                    | 0                                                         |
| Fluorouracil/irinotecan/leucovorin/oxaliplatin    | 1 (6)            | 0                                    | 0                                                         |
| Capcitabine/cisplatin/gemcitabine                 | 0                | 1 (5)                                | 0                                                         |
| Fluorouracil/leucovorin/oxaliplatin               | 0                | 1 (5)                                | 0                                                         |
| Capcitabine/fluorouracil/irinotecan/leucovorin    | 0                | 0                                    | 1 (3)                                                     |
| Cisplatin/irinotecan                              | 0                | 0                                    | 1 (3)                                                     |
| Dexamethasone/fluorouracil/leucovorin/ondansetron | 0                | 0                                    | 1 (3)                                                     |
| Fluorouracil/gemcitabine                          | 0                | 0                                    | 1 (3)                                                     |

<sup>a</sup>One patient in the nivolumab arm and five patients in the nivolumab plus ipilimumab plus cobimetinib arm received systemic therapies in both neoadjuvant and adjuvant settings.

**Supplemental Table 2** Cumulative dose and relative dose intensity for all treated patients

|                                          | <b>Nivolumab</b> | <b>Nivolumab plus ipilimumab</b> |                   | <b>Nivolumab plus ipilimumab plus cobimetinib</b> |                   |                    |
|------------------------------------------|------------------|----------------------------------|-------------------|---------------------------------------------------|-------------------|--------------------|
|                                          | <b>(n=18)</b>    | <b>(n=21)</b>                    |                   | <b>(n=30)</b>                                     |                   |                    |
|                                          | <b>Nivolumab</b> | <b>Nivolumab</b>                 | <b>Ipilimumab</b> | <b>Nivolumab</b>                                  | <b>Ipilimumab</b> | <b>Cobimetinib</b> |
| Relative dose intensity, n (%)           |                  |                                  |                   |                                                   |                   |                    |
| 90% to <110%                             | 16 (89)          | 18 (86)                          | 18 (86)           | 21 (70)                                           | 24 (80)           | 5 (17)             |
| 70% to <90%                              | 2 (11)           | 3 (14)                           | 3 (14)            | 6 (20)                                            | 6 (20)            | 9 (30)             |
| 50% to <70%                              | 0                | 0                                | 0                 | 2 (7)                                             | 0                 | 11 (37)            |
| <50%                                     | 0                | 0                                | 0                 | 1 (3)                                             | 0                 | 4 (13)             |
| Not reported                             | 0                | 0                                | 0                 | 0                                                 | 0                 | 1 (3)              |
| No. of doses received,<br>median (range) | 3.5 (1–26)       | 2.0 (1–5)                        | 2.0 (1–4)         | 5.0 (1–20)                                        | 2.0 (1–7)         | –                  |
| No. of doses received, n<br>(%)          |                  |                                  |                   |                                                   |                   |                    |
| 1                                        | 4 (22)           | 3 (14)                           | 3 (14)            | 5 (17)                                            | 12 (40)           | –                  |
| 2                                        | 0                | 8 (38)                           | 8 (38)            | 2 (7)                                             | 9 (30)            | –                  |
| 3                                        | 5 (28)           | 6 (29)                           | 6 (29)            | 3 (10)                                            | 5 (17)            | –                  |
| 4                                        | 1 (6)            | 3 (14)                           | 4 (19)            | 2 (7)                                             | 1 (3)             | –                  |

|                             | <b>Nivolumab<br/>(n=18)</b> | <b>Nivolumab plus ipilimumab<br/>(n=21)</b> |                   | <b>Nivolumab plus ipilimumab plus cobimetinib<br/>(n=30)</b> |                   |                            |
|-----------------------------|-----------------------------|---------------------------------------------|-------------------|--------------------------------------------------------------|-------------------|----------------------------|
|                             | <b>Nivolumab</b>            | <b>Nivolumab</b>                            | <b>Ipilimumab</b> | <b>Nivolumab</b>                                             | <b>Ipilimumab</b> | <b>Cobimetinib</b>         |
| >4                          | 8 (44)                      | 1 (5)                                       | 0                 | 18 (60)                                                      | 3 (10)            | –                          |
| Cumulative dose             |                             |                                             |                   |                                                              |                   |                            |
| Mean (SD)                   | 18.7 (18.7)                 | 2.7 (1.4)                                   | 6.7 (3.2)         | 18.4 (14.3)                                                  | 2.2 (1.5)         | 2735.9 (2484.2)            |
| Median (range) <sup>a</sup> | 10.7 (3.0–78.9)             | 2.0 (1.0–7.1)                               | 6.0 (1.9–12.4)    | 15.1 (3.0–60.1)                                              | 2.0 (1.0–7.0)     | 1980.0 (240.0–<br>11800.0) |

<sup>a</sup>Dose units: nivolumab and ipilimumab are mg/kg and cobimetinib in mg.

SD, standard deviation.

**Supplemental Table 3** Summary of responses per RECIST v1.1 by baseline PD-L1 status

|                                               | <b>Nivolumab</b> | <b>Nivolumab plus<br/>ipilimumab</b> | <b>Nivolumab plus<br/>ipilimumab plus<br/>cobimetinib</b> |
|-----------------------------------------------|------------------|--------------------------------------|-----------------------------------------------------------|
|                                               | <b>(n=18)</b>    | <b>(n=21)</b>                        | <b>(n=30)</b>                                             |
| <b>Tumor cell PD-L1 expression ≥5%, n (%)</b> | <b>2 (11)</b>    | <b>6 (29)</b>                        | <b>6 (20)</b>                                             |
| Objective response rate, n (%)                | 0                | 0                                    | 1 (16.7)                                                  |
| 95% CI                                        | 0–84.2           | 0–45.9                               | 0.4–64.1                                                  |
| Best overall response, n (%)                  |                  |                                      |                                                           |
| Complete response                             | 0                | 0                                    | 0                                                         |
| Partial response                              | 0                | 0                                    | 1 (17)                                                    |
| Stable disease                                | 0                | 1 (17)                               | 2 (33)                                                    |
| Progressive disease                           | 2 (100)          | 5 (83)                               | 2 (33)                                                    |
| Unable to determine                           | 0                | 0                                    | 1 (17)                                                    |
| Median PFS (95% CI) per investigator, months  | 1.2 (1.2–1.2)    | 1.35 (0.7–4.4)                       | 2.8 (0.7–NE)                                              |

|                                                  | <b>Nivolumab<br/>(n=18)</b> | <b>Nivolumab plus<br/>ipilimumab<br/>(n=21)</b> | <b>Nivolumab plus<br/>ipilimumab plus<br/>cobimetinib<br/>(n=30)</b> |
|--------------------------------------------------|-----------------------------|-------------------------------------------------|----------------------------------------------------------------------|
| Median PFS (95% CI) per BICR, months             | –                           | –                                               | 2.1 (0.7–NE)                                                         |
| Median OS (95% CI), months                       | 8.6 (2.0–15.2)              | 4.45 (1.5–6.7)                                  | 6.1 (1.2–NE)                                                         |
| <b>Tumor cell PD-L1 expression &lt;5%, n (%)</b> | <b>13 (72)</b>              | <b>8 (38)</b>                                   | <b>16 (53)</b>                                                       |
| Objective response rate, n (%)                   | 0                           | 0                                               | 1 (6.3)                                                              |
| 95% CI                                           | 0–24.7                      | 0–36.9                                          | 0.2–30.2                                                             |
| Best overall response, n (%)                     |                             |                                                 |                                                                      |
| Complete response                                | 0                           | 0                                               | 0                                                                    |
| Partial response                                 | 0                           | 0                                               | 1 (6)                                                                |
| Stable disease                                   | 4 (31)                      | 3 (38)                                          | 9 (56)                                                               |
| Progressive disease                              | 5 (38)                      | 4 (50)                                          | 5 (31)                                                               |
| Unable to determine                              | 4 (31)                      | 1 (13)                                          | 1 (6)                                                                |

|                                               | <b>Nivolumab</b> | <b>Nivolumab plus<br/>ipilimumab</b> | <b>Nivolumab plus<br/>ipilimumab plus<br/>cobimetinib</b> |
|-----------------------------------------------|------------------|--------------------------------------|-----------------------------------------------------------|
|                                               | <b>(n=18)</b>    | <b>(n=21)</b>                        | <b>(n=30)</b>                                             |
| Median PFS (95% CI) per investigator, months  | 1.45 (1.3–2.3)   | 1.3 (0.7–17.15)                      | 3.0 (1.5–5.5)                                             |
| Median PFS (95% CI) per BICR, months          | –                | –                                    | 3.9 (1.4–7.7)                                             |
| Median OS (95% CI), months                    | 3.35 (1.5–9.0)   | 2.4 (0.9–4.9)                        | 11.4 (3.65–NE)                                            |
| <b>Tumor cell PD-L1 expression ≥1%, n (%)</b> | <b>5 (28)</b>    | <b>8 (38)</b>                        | <b>8 (27)</b>                                             |
| Objective response rate, n (%)                | 0                | 0                                    | 1 (12.5)                                                  |
| 95% CI                                        | 0–52.2           | 0–36.9                               | 0.3–52.7                                                  |
| Best overall response, n (%)                  |                  |                                      |                                                           |
| Complete response                             | 0                | 0                                    | 0                                                         |
| Partial response                              | 0                | 0                                    | 1 (13)                                                    |
| Stable disease                                | 1 (20)           | 1 (13)                               | 2 (25)                                                    |
| Progressive disease                           | 3 (60)           | 6 (75)                               | 4 (50)                                                    |

|                                                  | <b>Nivolumab<br/>(n=18)</b> | <b>Nivolumab plus<br/>ipilimumab<br/>(n=21)</b> | <b>Nivolumab plus<br/>ipilimumab plus<br/>cobimetinib<br/>(n=30)</b> |
|--------------------------------------------------|-----------------------------|-------------------------------------------------|----------------------------------------------------------------------|
| Unable to determine                              | 1 (20)                      | 1 (13)                                          | 1 (13)                                                               |
| Median PFS (95% CI) per investigator, months     | 1.3 (1.2–2.3)               | 1.25 (0.7–1.4)                                  | 1.5 (0.7–NE)                                                         |
| Median PFS (95% CI) per BICR, months             | –                           | –                                               | 1.5 (0.7–NE)                                                         |
| Median OS (95% CI), months                       | 7.0 (1.45–15.2)             | 4.1 (0.9–6.7)                                   | 8.9 (1.2–12.9)                                                       |
| <b>Tumor cell PD-L1 expression &lt;1%, n (%)</b> | <b>10 (56)</b>              | <b>6 (29)</b>                                   | <b>14 (47)</b>                                                       |
| Objective response rate, n (%)                   | 0                           | 0                                               | 1 (7.1)                                                              |
| 95% CI                                           | 0–30.8                      | 0–45.9                                          | 0.2–33.9                                                             |
| Best overall response, n (%)                     |                             |                                                 |                                                                      |
| Complete response                                | 0                           | 0                                               | 0                                                                    |
| Partial response                                 | 0                           | 0                                               | 1 (7)                                                                |
| Stable disease                                   | 3 (30)                      | 3 (50)                                          | 9 (64)                                                               |



|                                                                                         | <b>Nivolumab</b> | <b>Nivolumab plus<br/>ipilimumab</b> | <b>Nivolumab plus<br/>ipilimumab plus<br/>cobimetinib</b> |
|-----------------------------------------------------------------------------------------|------------------|--------------------------------------|-----------------------------------------------------------|
|                                                                                         | <b>(n=18)</b>    | <b>(n=21)</b>                        | <b>(n=30)</b>                                             |
| Progressive disease                                                                     | 4 (40)           | 3 (50)                               | 3 (21)                                                    |
| Unable to determine                                                                     | 3 (30)           | 0                                    | 1 (7)                                                     |
| Median PFS (95% CI) per investigator, months                                            | 1.5 (0.6–3.9)    | 2.1 (1.1–17.15)                      | 3.9 (1.6–7.7)                                             |
| Median PFS (95% CI) per BICR, months                                                    | –                | –                                    | 3.9 (1.4–7.7)                                             |
| Median OS (95% CI), months                                                              | 2.9 (0.6–11.9)   | 3.4 (1.8–17.15)                      | 7.4 (3.1–NE)                                              |
| <b>Patients without quantifiable tumor cell PD-L1<br/>expression at baseline, n (%)</b> | <b>3 (17)</b>    | <b>7 (33)</b>                        | <b>8 (27)</b>                                             |
| Objective response rate, n (%)                                                          | 0                | 0                                    | 0                                                         |
| 95% CI                                                                                  | 0–70.8           | 0–41.0                               | 0–36.9                                                    |
| Best overall response, n (%)                                                            |                  |                                      |                                                           |
| Complete response                                                                       | 0                | 0                                    | 0                                                         |

---

|                     | <b>Nivolumab</b> | <b>Nivolumab plus<br/>ipilimumab</b> | <b>Nivolumab plus<br/>ipilimumab plus<br/>cobimetinib</b> |
|---------------------|------------------|--------------------------------------|-----------------------------------------------------------|
|                     | <b>(n=18)</b>    | <b>(n=21)</b>                        | <b>(n=30)</b>                                             |
| Partial response    | 0                | 0                                    | 0                                                         |
| Stable disease      | 1 (33)           | 3 (43)                               | 4 (50)                                                    |
| Progressive disease | 2 (67)           | 3 (43)                               | 2 (25)                                                    |
| Unable to determine | 0                | 1 (14)                               | 2 (25)                                                    |

---

BICR, blinded independent central review; CI, confidence interval; NE, not estimable; PD-L1, programmed death ligand 1; OS, overall survival; PFS, progression-free survival; RECIST, Response Evaluation Criteria in Solid Tumors.

## List of sites and investigators

| <b>Country</b> | <b>Principal Investigator</b> |
|----------------|-------------------------------|
| Finland        | Katriina Peltola              |
|                | Petri Bono                    |
| Spain          | Emiliano Calvo Aller          |
| United Kingdom | Thomas Evans                  |
|                | Ian Chau                      |
| USA            | Olatunji Alese                |
|                | Rathi Pillai                  |
|                | Kathryn Beckermann            |
|                | Emily Chan                    |
|                | Wendy Rathmell                |
|                | David Chism                   |
|                | Asim Amin                     |
|                | Dung Le                       |
|                | Patrick Ott                   |
|                | Margaret Callahan             |
|                | Neil Segal                    |
|                | Shivaani Kummar               |
|                | Matthew Taylor                |
|                | Jacqueline Vuky               |
|                | Michael Morse                 |
|                | Padmanee Sharma               |
|                | Johanna Bendell               |
| Joseph Eder    |                               |
| Merry Markham  |                               |
| Frederic Kaye  |                               |
